# Supplementary material for: G4IPDB: A database for G-quadruplex structure forming nucleic acid interacting proteins
Source: PubMed Central journal article supplement (PMC5131279; doi:10.1038/srep38144), 2016-12-01
Supplement: srep38144-s1.pdf [file srep38144-s1.pdf]

# G4IPDB: A database for G-quadruplex structure forming nucleic acid interacting proteins

Subodh Kumar Mishra<sup>1</sup>, Arpita Tawani<sup>1</sup>, Amit Mishra<sup>2</sup> & Amit Kumar<sup>1,\*</sup>

<sup>1</sup>Centre for Biosciences and Biomedical Engineering, Indian Institute of Technology Indore, Indore, Madhya Pradesh, 453552, India

<sup>2</sup>Cellular and Molecular Neurobiology Unit, Indian Institute of Technology Jodhpur, Rajasthan, 342011, India

\* To whom correspondence should be addressed. Dr. Amit Kumar, Tel:+91-731-2438771; Fax:+91-731-2364182; Email: amik@iiti.ac.in

## G4IPDB database description

MySQL RDBMS (relational database management system) is used for storing data. The main tables are as follows:

- 1) allip2 (stores information about all type of target nucleic acid)
- 2) g4dip (stores information about target G quadruplex DNA)
- 3) g4rip (stores information about target G quadruplex RNA)
- 4) g4dnabrowse (stores interaction information about Target G quadruplex DNA and proteins)
- 5) g4rnabrowse (stores interaction information about Target G quadruplex RNA and proteins)

Note: The following notations are used:

**PRI:** primary key, generally auto-generated by the database

**UNI:** this field will take only unique values

**NULL:** used to represent no value

**varchar:** MySQL data type, used for storing a string of limited length efficiently

**int:** MySQL data type, used to represent an integer

The Description of tables' fields is given below:

### Supplementary Table S1: Allip2

| Field                  | Type         | Null | Collation         | Default |
|------------------------|--------------|------|-------------------|---------|
| id                     | varchar(500) | No   | latin1_swedish_ci | None    |
| targetname             | varchar(500) | No   | latin1_swedish_ci | --      |
| targetseq              | varchar(500) | Yes  | latin1_swedish_ci | --      |
| interactingproteinname | varchar(500) | No   | latin1_swedish_ci | N/A     |

|                  |              |     |                   |     |
|------------------|--------------|-----|-------------------|-----|
|                  |              |     |                   |     |
| Synonyms         | varchar(500) | No  | latin1_swedish_ci | N/A |
| length           | varchar(500) | No  | latin1_swedish_ci | N/A |
| Uniprotcode      | int(500)     | Yes | latin1_swedish_ci | N/A |
| Uniprotname      | varchar(500) | No  | latin1_swedish_ci | N/A |
| genename         | varchar(500) | No  | latin1_swedish_ci | N/A |
| organism         | varchar(500) | No  | latin1_swedish_ci | N/A |
| Gene_synonyms    | varchar(500) | Yes | latin1_swedish_ci | N/A |
| uniprotfastalink | varchar(500) | No  | latin1_swedish_ci | N/A |
| bind1            | varchar(500) | No  | latin1_swedish_ci |     |
| bind2            | varchar(500) | No  | latin1_swedish_ci |     |
| bind3            | varchar(500) | Yes | latin1_swedish_ci | N/A |
| bindn            | varchar(500) | No  | latin1_swedish_ci | N/A |
| technique        | varchar(500) | No  | latin1_swedish_ci | --  |
| pdb1             | varchar(500) | No  | latin1_swedish_ci | --  |
| pdb2             | varchar(500) | No  | latin1_swedish_ci | --  |
| graph            | varchar(500) | No  | latin1_swedish_ci | --  |
| pmid             | varchar(500) | No  | latin1_swedish_ci | --  |

|            |              |    |                   |    |
|------------|--------------|----|-------------------|----|
| authorname | varchar(500) | No | latin1_swedish_ci | -- |
|------------|--------------|----|-------------------|----|

**Supplementary Table S2: g4dip**

| Field                  | Type         | Null | Collation         | Default |
|------------------------|--------------|------|-------------------|---------|
| id                     | varchar(500) | No   | latin1_swedish_ci | None    |
| targetname             | varchar(500) | No   | latin1_swedish_ci | --      |
| targetseq              | varchar(500) | Yes  | latin1_swedish_ci | --      |
| interactingproteinname | varchar(500) | No   | latin1_swedish_ci | N/A     |
| Synonyms               | varchar(500) | No   | latin1_swedish_ci | N/A     |
| length                 | varchar(500) | No   | latin1_swedish_ci | N/A     |
| Uniprotcode            | int(500)     | Yes  | latin1_swedish_ci | N/A     |
| Uniprotname            | varchar(500) | No   | latin1_swedish_ci | N/A     |
| genename               | varchar(500) | No   | latin1_swedish_ci | N/A     |
| organism               | varchar(500) | No   | latin1_swedish_ci | N/A     |
| Gene_synonyms          | varchar(500) | Yes  | latin1_swedish_ci | N/A     |
| uniprotfastalink       | varchar(500) | No   | latin1_swedish_ci | N/A     |
| bind1                  | varchar(500) | No   | latin1_swedish_ci |         |
| bind2                  | varchar(500) | No   | latin1_swedish_ci |         |
| bind3                  | varchar(500) | Yes  | latin1_swedish_ci | N/A     |

|            |              |    |                   |     |
|------------|--------------|----|-------------------|-----|
|            |              |    |                   |     |
| bindn      | varchar(500) | No | latin1_swedish_ci | N/A |
| technique  | varchar(500) | No | latin1_swedish_ci | --  |
| pdb1       | varchar(500) | No | latin1_swedish_ci | --  |
| pdb2       | varchar(500) | No | latin1_swedish_ci | --  |
| graph      | varchar(500) | No | latin1_swedish_ci | --  |
| pmid       | varchar(500) | No | latin1_swedish_ci | --  |
| authorname | varchar(500) | No | latin1_swedish_ci | --  |

**Supplementary Table S3: g4rip**

| Field                  | Type         | Null | Collation         | Default |
|------------------------|--------------|------|-------------------|---------|
| id                     | varchar(500) | No   | latin1_swedish_ci | None    |
| targetname             | varchar(500) | No   | latin1_swedish_ci | --      |
| targetseq              | varchar(500) | Yes  | latin1_swedish_ci | --      |
| interactingproteinname | varchar(500) | No   | latin1_swedish_ci | N/A     |
| Synonyms               | varchar(500) | No   | latin1_swedish_ci | N/A     |
| length                 | varchar(500) | No   | latin1_swedish_ci | N/A     |
| Uniprotcode            | int(500)     | Yes  | latin1_swedish_ci | N/A     |
| Uniprotname            | varchar(500) | No   | latin1_swedish_ci | N/A     |
| genename               | varchar(500) | No   | latin1_swedish_ci | N/A     |

|                  |              |     |                   |     |
|------------------|--------------|-----|-------------------|-----|
| organism         | varchar(500) | No  | latin1_swedish_ci | N/A |
| Gene_synonyms    | varchar(500) | Yes | latin1_swedish_ci | N/A |
| uniprotfastalink | varchar(500) | No  | latin1_swedish_ci | N/A |
| bind1            | varchar(500) | No  | latin1_swedish_ci |     |
| bind2            | varchar(500) | No  | latin1_swedish_ci |     |
| bind3            | varchar(500) | Yes | latin1_swedish_ci | N/A |
| bindn            | varchar(500) | No  | latin1_swedish_ci | N/A |
| technique        | varchar(500) | No  | latin1_swedish_ci | --  |
| pdb1             | varchar(500) | No  | latin1_swedish_ci | --  |
| pdb2             | varchar(500) | No  | latin1_swedish_ci | --  |
| graph            | varchar(500) | No  | latin1_swedish_ci | --  |
| pmid             | varchar(500) | No  | latin1_swedish_ci | --  |
| authorname       | varchar(500) | No  | latin1_swedish_ci | --  |

**Supplementary Table S4: g4dnabrowse**

| Field               | Type         | Null | Collation         | Default |
|---------------------|--------------|------|-------------------|---------|
| interaction_id      | varchar(500) | No   | latin1_swedish_ci | None    |
| g4dna_name          | varchar(500) | No   | latin1_swedish_ci | --      |
| Interacting_protein | varchar(500) | Yes  | latin1_swedish_ci | --      |
| target_dna_seq      | varchar(500) | No   | latin1_swedish_ci | N/A     |
| Reference           | int(500)     | No   | latin1_swedish_ci | N/A     |

|                   |              |    |                   |     |
|-------------------|--------------|----|-------------------|-----|
|                   |              |    |                   |     |
| UniProtcode       | varchar(500) | No | latin1_swedish_ci | N/A |
| uniprot-entryname | varchar(500) | No | latin1_swedish_ci | N/A |

**Supplementary Table S5: g4rnabrowse**

| Field               | Type         | Null | Collation         | Default |
|---------------------|--------------|------|-------------------|---------|
| interaction_id      | varchar(500) | No   | latin1_swedish_ci | None    |
| g4dna_name          | varchar(500) | No   | latin1_swedish_ci | --      |
| Interacting_protein | varchar(500) | Yes  | latin1_swedish_ci | --      |
| target_dna_seq      | varchar(500) | No   | latin1_swedish_ci | N/A     |
| Reference           | int(500)     | No   | latin1_swedish_ci | N/A     |
| UniProtcode         | varchar(500) | No   | latin1_swedish_ci | N/A     |
| uniprot-entryname   | varchar(500) | No   | latin1_swedish_ci | N/A     |

## Descriptors definition

### 1. Protein FASTA sequence

FASTA sequence file format starts with greater-than (">") symbol and have one line description about sequence (less than 80 character set )and followed by the sequence data. For instance an example of FASTA sequence given below:

```
>gi|649115499|gb|AIC53396.1| C9orf72, partial [synthetic construct]
MSTLCPPPPSPAVAKTEIALSGKSPLLAATFAYWDNII LGPRVRHIWAPKTEQVLLSDGEITFLANHTLNGEILR
NAESGAIDVKFFVLSEKGVII VSLIFDGNWNGDRSTYGLSII LPQTELSFYLP LHRVCVDRDLTHIIRKGR IWM
HKERQENVQKI ILEGTERMEDQGQSI I PMLTGEVI PVMELLSMKSHSVPEEIDIADTVLNDDDIGDSCHEGF
LLNAISSHLQTCGCSVVVGSSAEKVNKIVRTLCLFLTPAERKCSRLCEAESSFKYESGLFVQGLLKDSTGFSFV
LPFRQVMYAPYPTTHIDVDVNTVKQMPPCHEHIYNQRRYMRSELTAFWRATSEEDMAQDTIIYTDESFTPD LN
IFQDVLHRDRTL VKAFLDQVFQ LKPGLSLRSTFLAQFLLVLRKALT LIKYIEDDTQKGKPKFKSLRNLKIDLD
LTAEGDLNIIMALAEKIKPGLHSFIFGRPFYTSVQERDVLMTF
```

Space and blank lines are not allowed in the sequence data and sequence data must be represented in the IUB/IUPAC amino acid and nucleic acid codes. A single hyphen or dash can be used to represent a gap of indeterminate length; and in amino acid sequences, U and \* are acceptable letters (see below). The list of accepted code are as in below table.

**Supplementary Table S6: one letter Code for the amino acid**

|                         |                                |
|-------------------------|--------------------------------|
| Code: Discription       | Code: Discription              |
| A: alanine              | R: arginine                    |
| P: proline              | D: aspartate                   |
| B: aspartate/asparagine | S: serine                      |
| Q: glutamine            | E: glutamate                   |
| C: cystine              | T: threonine                   |
| V: valine               | F: phenylalanine               |
| H: histidine            | U: selenocysteine              |
| W: tryptophan           | G: glycine                     |
| I: isoleucine           | X: any                         |
| Y: tyrosine             | N: asparagine                  |
| L: leucine              | Z: glutamate/glutamine         |
| K: lysine               | *: translation stop            |
| M: methionine           | -: gap of indeterminate length |

## 2. Gene ID

This is the unique identifier assign to the each gene present in the Gene database. User can directly access the entries in the Gene database by entering the respective Gene ID. This identifier ease the access various gene detail such as gene official symbols, primary source, organism, lineage, gene summary, and gene genomic context etc.

## 3. PDB ID

PDB (Protein Data Bank) , is a structural database and have the information about the 3D structure of proteins, nucleic acid, and their complex. A 4 letter alphanumeric unique code attributed to each entry in the PDB database. User can directly search the protein or nucleic acid structure by directly using the respective PDB ID.

## 4. UniProtID

UniProt is freely available comprehensive database of proteins containing information about there their sequence and biological function extracted from the available research data. This database provides a unique ID to each entry in the database which contains alphanumeric characters. For example P07271, P54132, O94761, etc.
